# Supplementary material for: Dealing with Consumer Differences in Liking during Repeated Exposure to Food; Typical Dynamics in Rating Behavior
Source: PubMed Central journal article supplement (PMC3965558; doi:10.1371/journal.pone.0093350), 2014-03-25

Taste 1

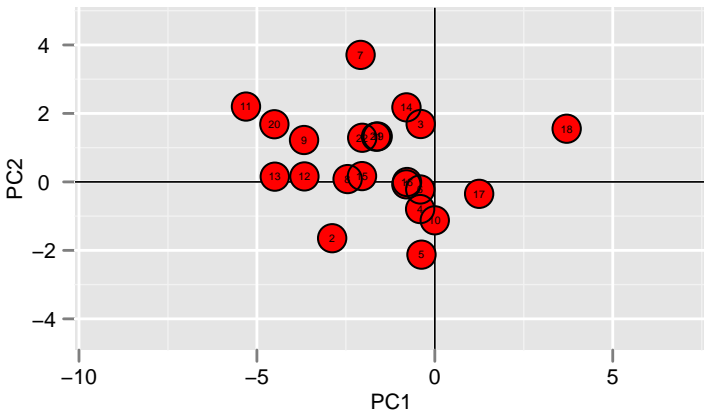

Taste 2

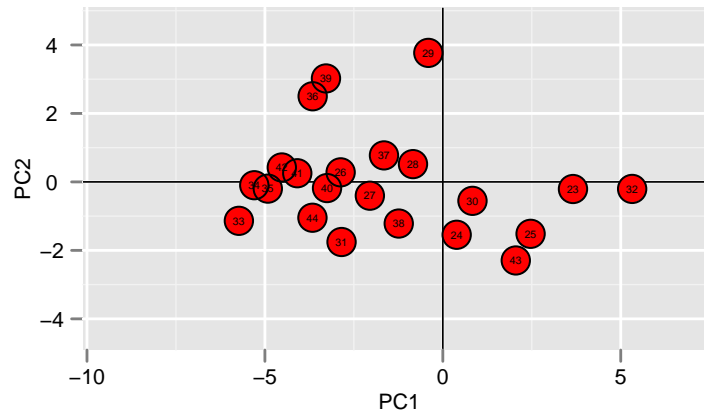

Taste 3

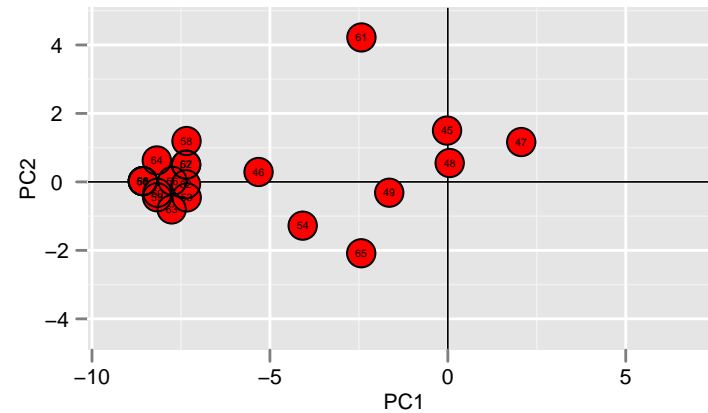

Taste 4

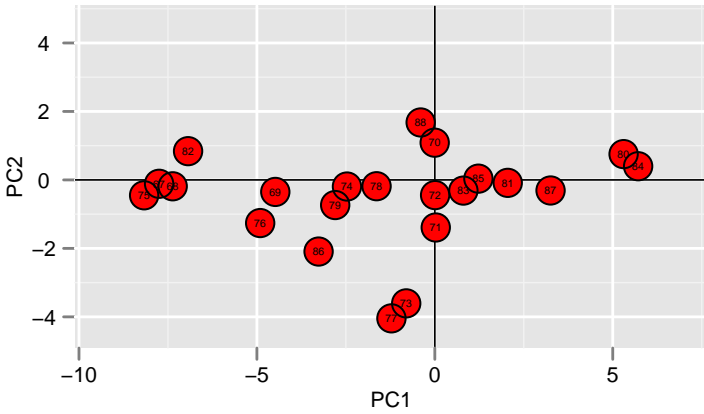

Taste 5

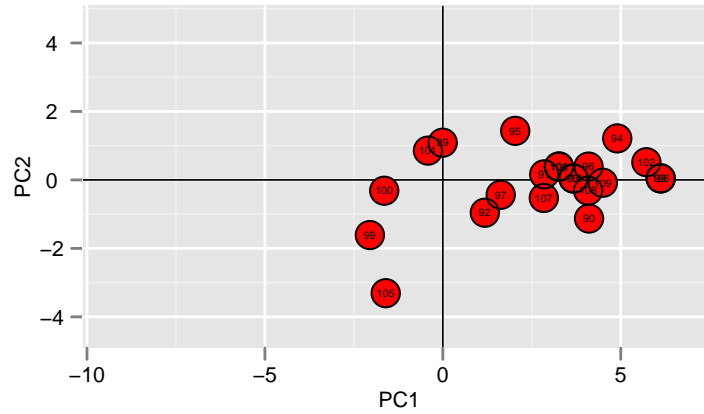

Taste 6

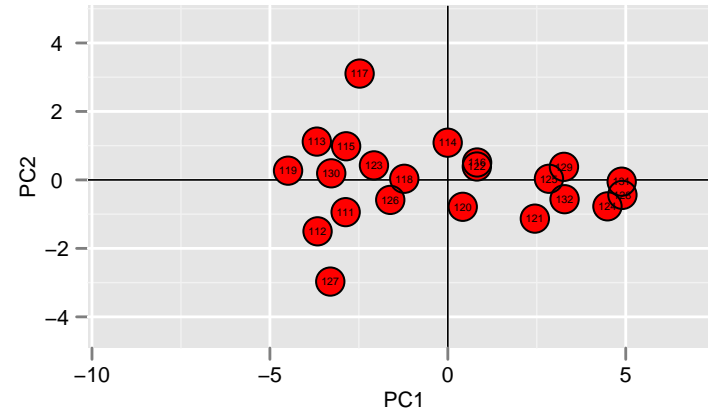

Taste 7

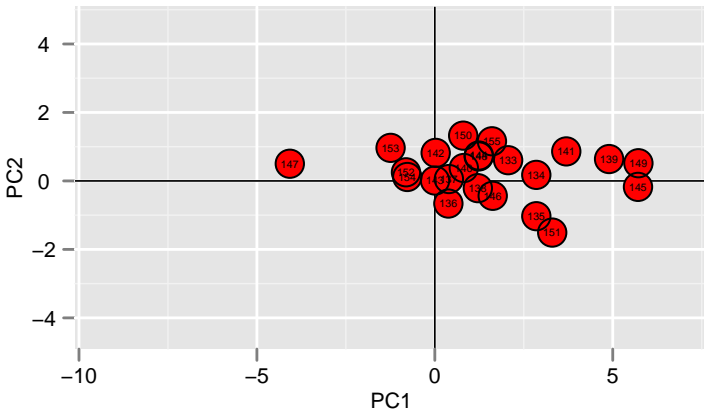

Taste 8

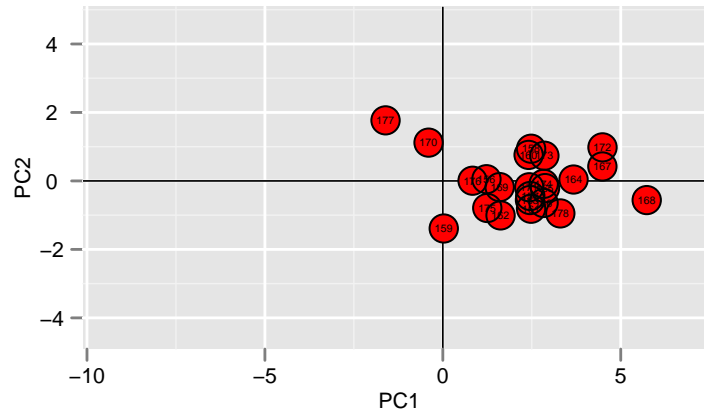

Taste 9

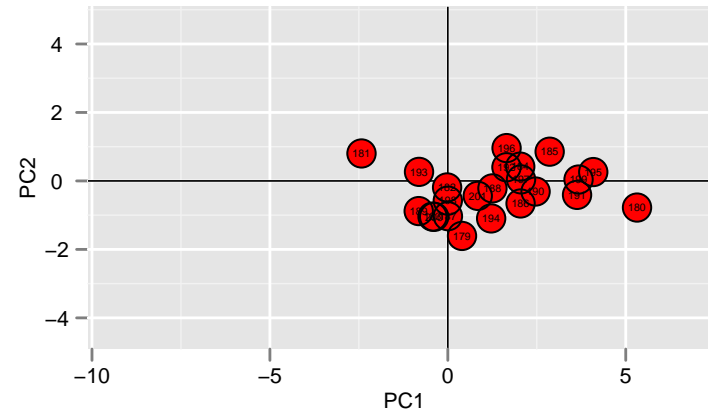

Taste 10

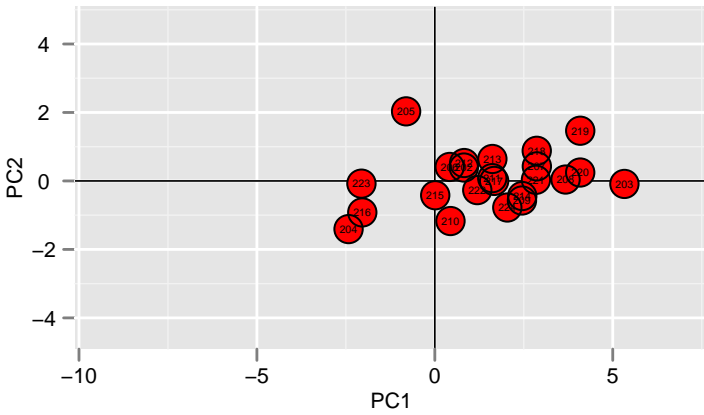

Taste 11

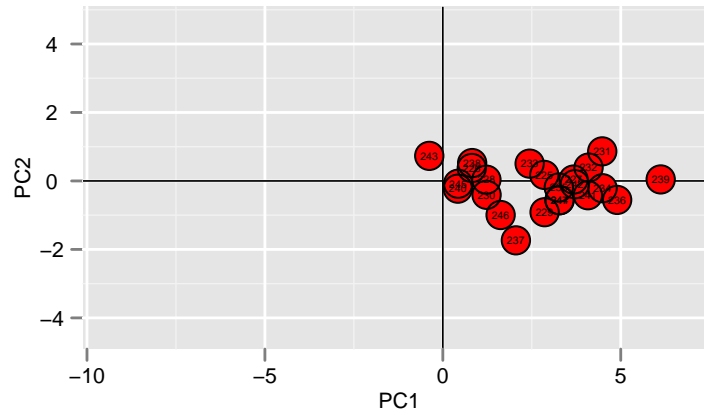

Taste 12

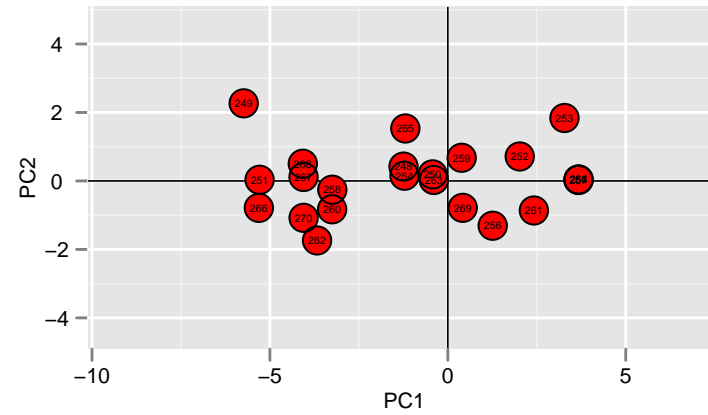

Taste 13

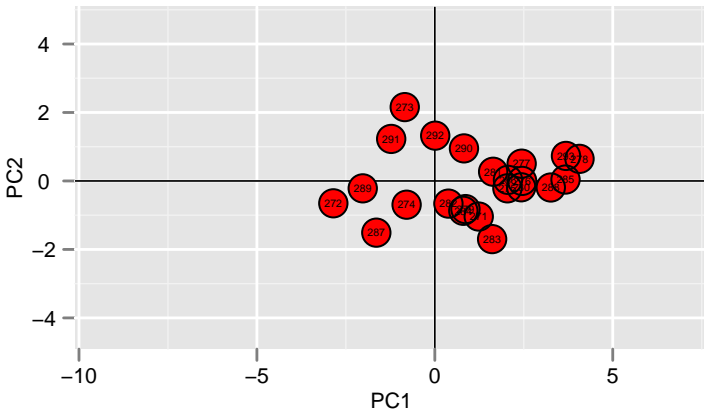

Taste 14

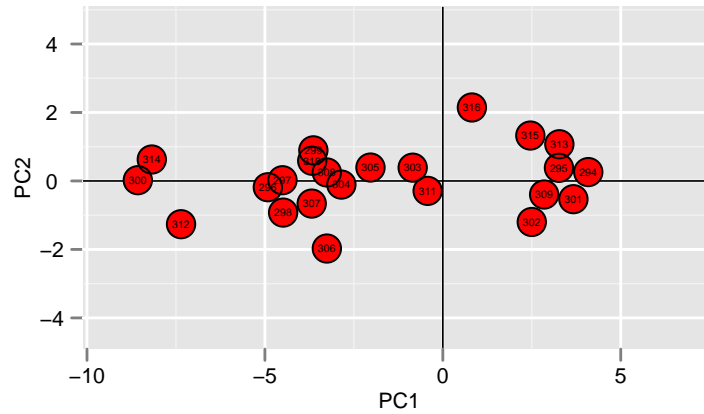

Supplement: pone.0093350.s002.pdf [file pone.0093350.s002.pdf]
