# Supplementary material for: Dealing with Consumer Differences in Liking during Repeated Exposure to Food; Typical Dynamics in Rating Behavior
Source: PubMed Central journal article supplement (PMC3965558; doi:10.1371/journal.pone.0093350), 2014-03-25

Liking scores for 4 clusters

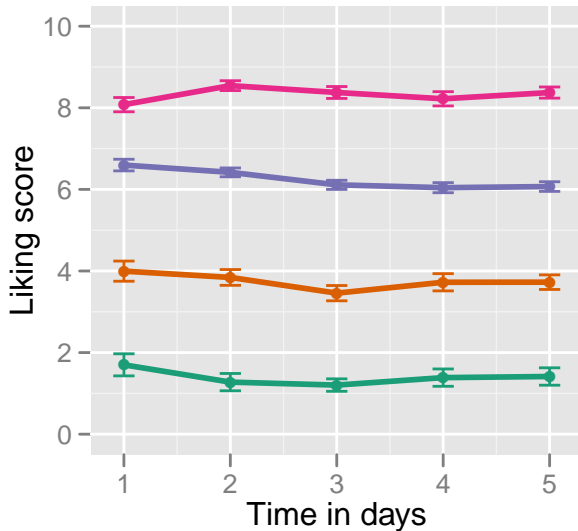

Liking scores for 5 clusters

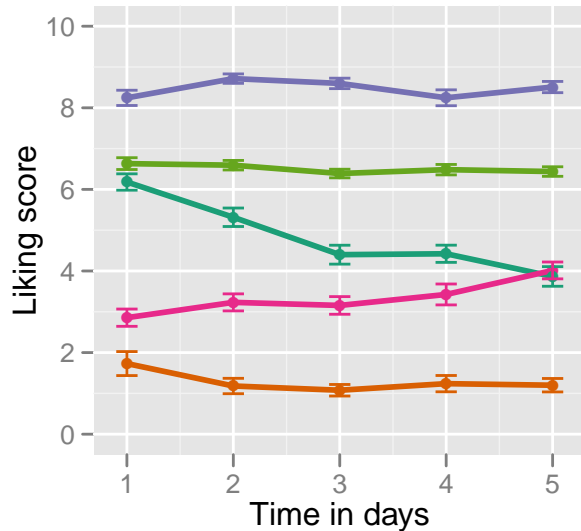

Liking scores for 6 clusters

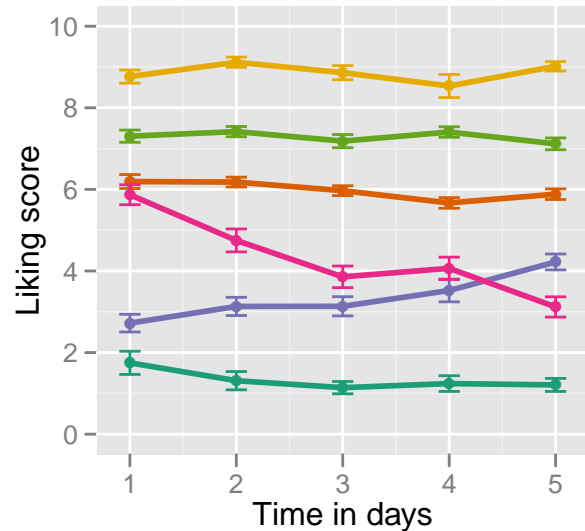

Supplement: pone.0093350.s004.pdf [file pone.0093350.s004.pdf]
